# Supplementary material for: Canadian Nationwide Survey on Pediatric Malnutrition Management in Tertiary Hospitals
Source: MDPI journal article supplement (doi:10.3390/nu13082635), 2021-07-30
Supplement: s1 [file s1]

## **Supplementary file S1. Original questionnaire**

### **1. In which Children's Hospital do you work?**

Alberta Children's Hospital  
British Columbia Children's Hospital  
Centre hospitalier universitaire de Québec, Centre mère enfant Soleil  
Centre hospitalier universitaire Sainte-Justine  
Centre hospitalier universitaire de Sherbrooke-Hôpital de Fleurimont  
Children's Hospital of Eastern Ontario  
Children's Hospital at London Health Sciences Centre  
The Children's Hospital of Winnipeg  
The Hospital for Sick Children  
IWK Health Centre  
Janeway Children's Health and Rehabilitation Centre  
McMaster Children's Hospital  
Montreal Children's Hospital  
Saskatchewan Children's Hospital  
Stollery Children's Hospital

### **2. What is your profession?**

General pediatrician (MD)  
Pediatric medical specialist  
Dietitian (RD)  
Pediatric nurse (RN)

## **Medical/Nursing Survey**

### **3. What type of hospital unit are you currently working in? (Select only one. If you work at multiple units, select the PRIMARY unit.)**

Cardiology  
Endocrinology  
Gastroenterology  
General Medicine  
Genetics  
Nephrology  
Neurology  
Oncology  
Respiratory  
Surgery  
Transplant  
Other (please specify)

## **NUTRITIONAL CARE IN YOUR HOSPITAL – PREVENTION - DETECTION**

**4. Does the department of pediatrics have an overarching protocol or guideline outlining prevention, detection and intervention for pediatric malnutrition that applies to all pediatric services?**

Yes

Work in progress

No

Do not know

Other (please specify)

**5. (If yes) Which of the following does the protocol/guideline cover? (Select all that apply)**

Nutritional screening

Nutritional assessment

Nutritional intervention

Scope of responsibility for dietitians

**6. Is your inpatient RD staffing adequate to provide nutrition care in a timely fashion?**

Yes

No

Don't know

**7. (If yes) Do the dietitians take part in one or more nursing, medical or interdisciplinary rounds on the unit?**

Yes, it is a regular activity

Yes, but only on specific units

No

Don't know

## **NUTRITIONAL SCREENING & ASSESSMENT IN HOSPITALIZED CHILDREN**

**8. Indicate the frequency with which nutrition screening for undernutrition in pediatric patients occurs upon admission to hospital?**

Always

Sometimes

Never

Don't know

**If Sometimes, please specify:**

**9. Which of the following approaches do you use to routinely screen for undernutrition in pediatric patients on admission to the hospital? (Select all that apply)**

Validated malnutrition risk screening tools (e.g. StrongKids, PNST, PYMS, STAMP)

Height for age percentiles or Z scores  
Weight for age percentiles or Z scores  
BMI or weight for height percentiles or Z scores  
Assess changes in weight (loss or slow weight gain)  
Classify them according to their underlying condition (e.g. high nutritional risk disease)  
Assess the impact of the current medical condition on intake, and/or requirements  
Visual inspection (eye-balling)  
Assess changes in normal/usual dietary intake  
Other (please specify)

**10. Which validated nutritional risk screening tool do you use?**

PYMS  
STAMP  
STRONGkids  
PeDiSMART  
PNST  
Other (please specify)

**11. How is the malnutrition screen administered?**

Electronic directly in electronic medical record (EMR)  
Paper form  
Other (please specify)

**12. Who is primarily responsible for performing the nutritional risk screening tool?**

Attending pediatrician  
Attending resident/fellow  
Nurse admitting the child  
Dietitian  
Other (please specify)

**13. Who is primarily responsible for interpreting the score of the nutritional risk screening tool and arrange the next steps advised by the tool?**

Most responsible physician  
Most responsible fellow/resident  
Nurse taking care of the child  
Dietitian  
Other (please specify)

**14. Indicate the frequency with which nutritional status is routinely assessed on admission to hospital?**

Always

Sometimes  
Never  
Don't know

**If Sometimes, please specify:**

**15. Which of the following approaches do you use to assess nutritional status? (Select all that apply)**

Height for age percentiles or Z scores  
Weight for age percentiles or Z scores  
BMI or weight for height (WFH) percentiles or Z scores  
Subjective Global Nutrition assessment (SGNA)  
Academy of Nutrition and Dietetics (Academy) and ASPEN Consensus Malnutrition Characteristics for Pediatric Malnutrition  
Measure blood nutritional markers (e.g. albumin, prealbumin)  
Measure blood micronutrient status (vitamins and minerals)  
Visual inspection (eye-balling)  
Measure body composition (e.g. skin folds, MUAC)  
Measure inflammatory markers (e.g. CRP)  
Assess strength and energy levels  
Diet history  
Medical history  
Refer to a dietitian to assess at risk children  
Other (please specify)

**16. Who raises nutrition issues to the medical team? (Select all that apply)**

Medical staff  
Nursing staff  
Nutrition staff  
Patient and/or Family

**17. Does your facility have a protocol/policy that outlines growth measurement techniques, equipment and frequency for weight, height and head circumference measures for inpatients?**

Yes  
No  
Don't know

**18. How often is the weight and height of children measured within 24 hours after admission to the hospital (or a few days in advance when the admission was planned for a procedure)?**

Always  
Most of the times  
Sometimes  
Never  
Don't know

**19. Who is primarily responsible for the interpretation of weight and height measurements, e.g. interpretation of growth and assessing the presence of a poor nutritional status?**

Most responsible physician  
Most responsible resident/fellow  
Nurse taking care of the child  
Dietitian  
Other (please specify)

**20. What equipment is used routinely to measure length or height in admitted infants/children? (Select all that apply)**

Calibrated stadiometer or length boards  
Tape measure  
Knee height caliper  
Ask parent for last measurement done at home  
Height devices attached to scales  
Other (please specify)

**21. Are nutritional problems of admitted patients routinely taken into account on unit rounds?**

Yes  
No  
Don't know

**TREATMENT**

**22. If a child is identified as being at nutrition risk on admission, do you have standard practices outlined on next steps?**

Yes  
No  
We do not screen

**23. (If yes) What is the next step when a child is identified?**

Referral to dietitian for assessment and nutritional advice  
Complete a Subjective global nutritional assessment (SGNA)  
Physician orders oral nutrition supplements

Physician orders nutrition support (enteral or parenteral nutrition)

Other (please specify)

**24. If a child is identified as being malnourished, please rank the following choices in order of priority of usual practice. (1 = most common; 4 = least common)**

Patients oral intake is optimized; example, high protein high calorie diet with likes/dislikes considered

Oral nutrition supplements are provided

Small amounts of nutrition supplements are provided at regular intervals (often called "Med pass")

Nutrition support (enteral or parenteral nutrition) is instituted

**25. Are all patients regularly monitored to determine if they are meeting their food intake requirements? (Select all that apply)**

They are not regularly monitored

Meal time audits

Calorie counts

Nurses chart % of meal eaten for each meal

Other (please specify)

**26. Are malnourished patients regularly monitored to determine if they are meeting their food intake requirements? (Select all that apply)**

They are not regularly monitored

Meal time audits

Calorie counts

Nurses chart % of meal eaten for each meal

Other (please specify)

**27. Please review the following reasons that patients may not eat on your hospital unit and indicate the importance of each using the following rating system (Rarely a problem, Sometimes a problem, Commonly a problem, Don't Know)**

Tray delivery is not coordinated between Food Services and Nursing

Appearance, taste, or aroma of food is poor

The meals are not appropriate for children

Food/fluid temperature is inappropriate

Patients are not given enough time to eat

Patient meals are interrupted by procedures or medical care

Patients' pain and symptoms are not well managed

Not able to give sufficient assistance with eating

Foods are not offered often enough

## **NUTRITIONAL FOLLOW-UP AT DISCHARGE**

**28. Are the weights/heights of children measured at discharge from the hospital? (Select the most applicable response.)**

Always

Most of the times

Sometimes - Only when the length of stay was >5 days

Sometimes - Depends on child's age

Never

Other (please specify)

**29. Is information about the nutritional status provided in the discharge summary? (Select the most applicable response.)**

Yes, growth is commented on routinely including the difference between admission and discharge weight/height/or length and what would be expected.

Yes, and if malnutrition is present, it is included

No

No, not routinely, only if nutritional status was a problem noted during admission

Not sure

Other (please specify)

**30. When a child is identified with poor nutritional status, which of the following terms do you record in your discharge summary? (Select all that apply)**

Malnutrition or severe malnutrition based on ICD-10 codes

Failure to thrive

Growth failure

It is not a common problem, so don't have an opportunity to comment on it

Not applicable

Other (please specify)

**31. When a child with malnutrition or poor nutritional status is discharged from the hospital, is the nutritional care transferred to another health care professional for follow-up?**

Always

Sometimes

Never

Don't know

Other (please specify)

**32. (If yes) Please order the following options, based on the frequency with which referrals are sent (1 = the most).**

Patient seen by multidisciplinary team in ambulatory clinic

Dietitian in hospital continues care  
Dietitian outpatient clinic  
Specialist Pediatrician  
Family doctor in primary care  
Other (please specify)

**33. What, if any, barriers do you experience for the adequate transfer of nutritional care for malnourished children after discharge from the hospital? (Select all that apply)**

Lack of staff to refer to  
Low staff awareness on the role of nutrition on patient care  
Other (please specify)

**34. How satisfied are you with the level of nutritional care for pediatric inpatients on a scale from 1 to 10, where 10 = is most satisfied and 1 = least satisfied?**

1-10

**35. What suggestions do you have for improvement of nutritional care?**

(Open-ended question)

## **EDUCATION AND TRAINING**

**36. Rate your knowledge of the treatment of malnourished patients on a scale from 1 to 10, where 1 = inadequate knowledge and 10 = very good knowledge.**

1-10

**37. How interested are you in the treatment of malnourished patients on a scale from 1 to 10, where 1 = not interested and 10 = very interested?**

1-10

**38. On which topics, would you be interested in more education or training? (Select all that apply)**

Education about nutritional screening  
Education about Subjective Global Nutrition Assessment (SGNA)  
Education about treatment of malnutrition  
Education about nutrition protocols  
None  
Other (please specify)

**39. What delivery format of training would you prefer? (Select all that apply)**

E-learning or online modules  
Online information  
Course or workshop in your own hospital  
Course or workshop in the region



Course or workshop on a national level

Course or workshop on an international level

Other (please specify)

**40. Please provide further comments and/or questions as you wish.**

(Open-ended question)
